# Supplementary material for: Danggui Buxue Decoction Sensitizes the Response of Non-Small-Cell Lung Cancer to Gemcitabine via Regulating Deoxycytidine Kinase and P-glycoprotein
Source: MDPI journal article supplement (doi:10.3390/molecules24102011), 2019-05-25
Supplement: s1 [file s1]

## Supplementary materials

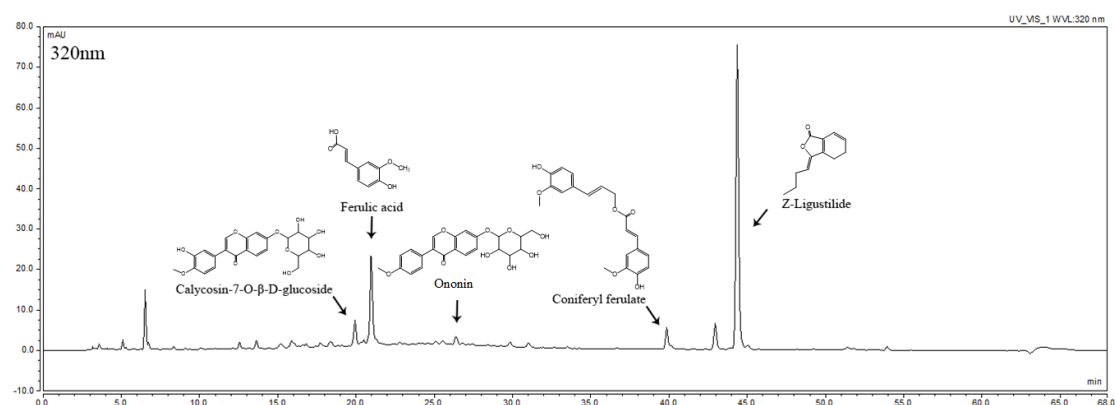

**Fig. S1.** HPLC chromatogram of determination of Danggui Buxue decoction. The 0.3 g/mL (w/v, dry weight/water) DBD contained Z-Ligustilide (333.1  $\mu\text{g/mL}$ ), ferulic acid (57.8  $\mu\text{g/mL}$ ), ononin (75.9  $\mu\text{g/mL}$ ), coniferyl ferulate (2.5  $\mu\text{g/mL}$ ) and calycosin-7-O- $\beta$ -D-glucoside (131.1  $\mu\text{g/mL}$ ). The decoction product of DBD used for the study was analyzed by a validated reversed phase HPLC system using a GL Sciences InertSustain C18 column (4.6 $\times$ 250mm, 5 $\mu\text{m}$ ). The following gradient system was employed: mobile phase A (5% methanol containing 0.1% formic acid) and mobile phase B (50:50 methanol: acetonitrile), 10% (v/v) B at 0 min; 80% B at 60 min; 10% B at 61 min; 10% B at 68 min. The injection volume was 20  $\mu\text{l}$ . The flow rate was 1 mL/min and ultraviolet detection was performed at 320 nm with a DAD-3000(RS) diode array UV/VIS detector.

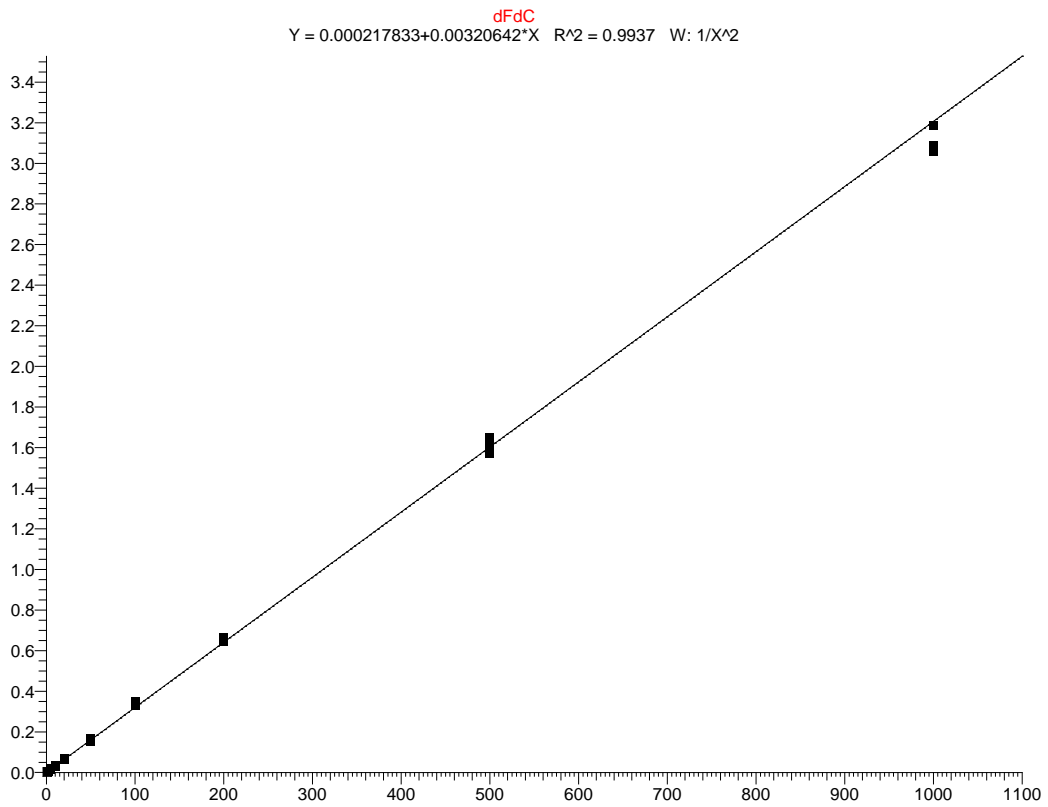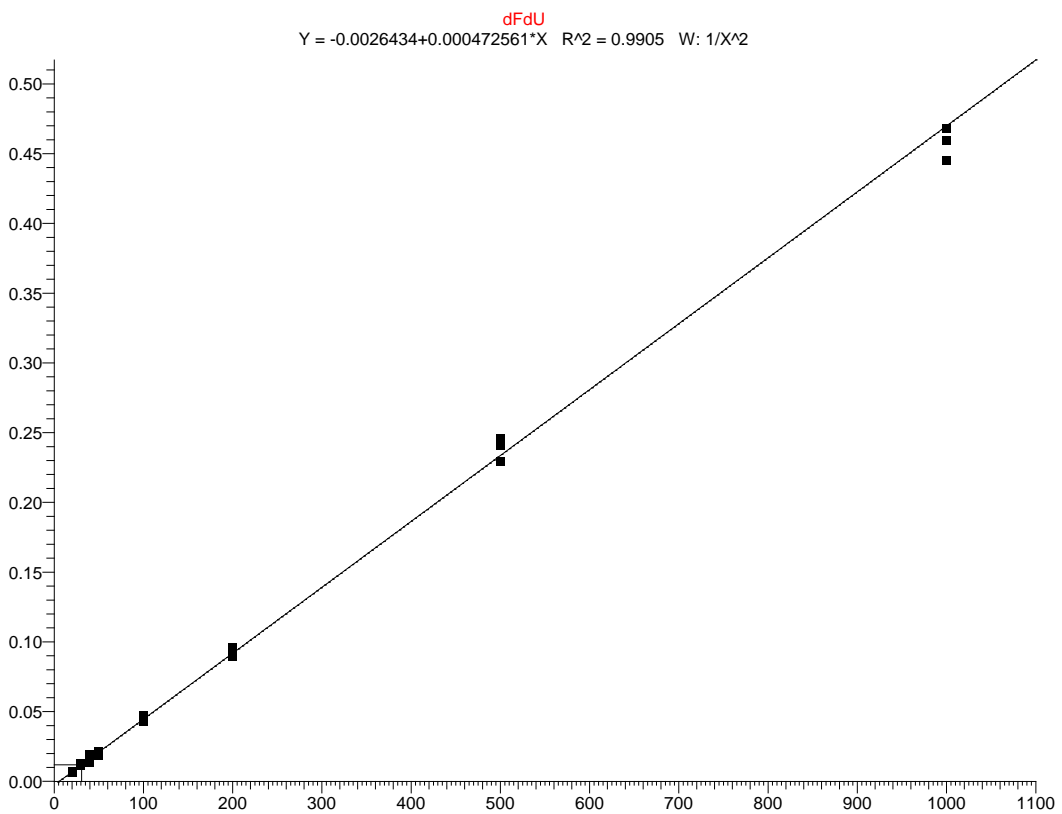

**Fig. S2.** Linear regression data of dFdC and dFdU in rat plasma. The linear range for dFdC was 1–1000 ng/mL, and for dFdU was 20-1000 ng/mL.

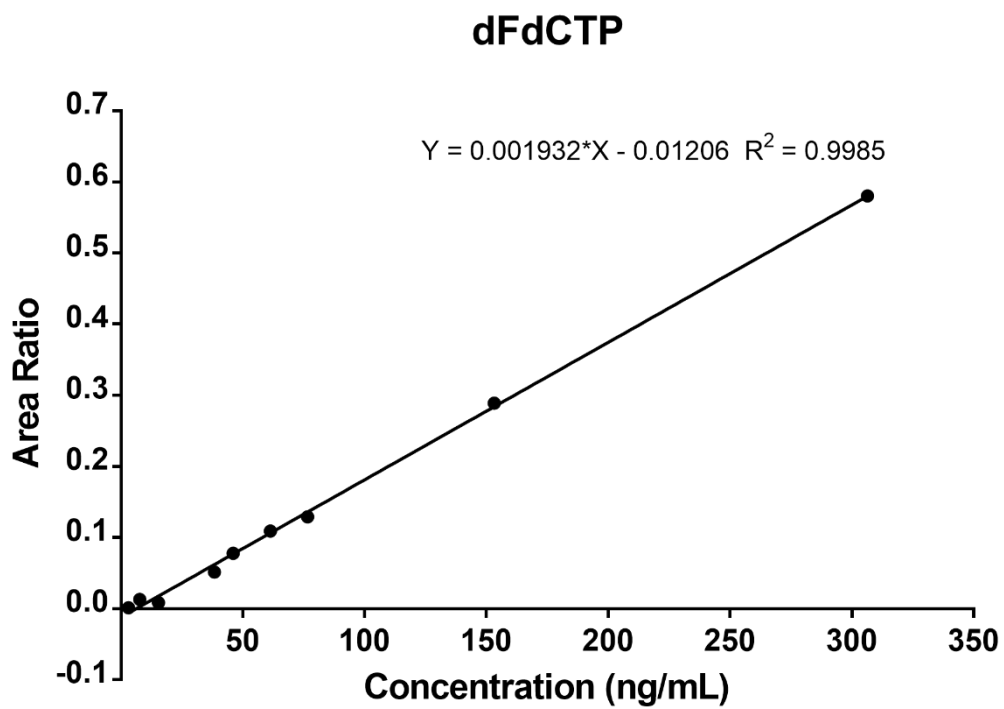

**Fig. S3.** Linear regression data of dFdCTP in rat PBMC. The linear range for dFdCTP was 3.06–306.45 ng/mL.

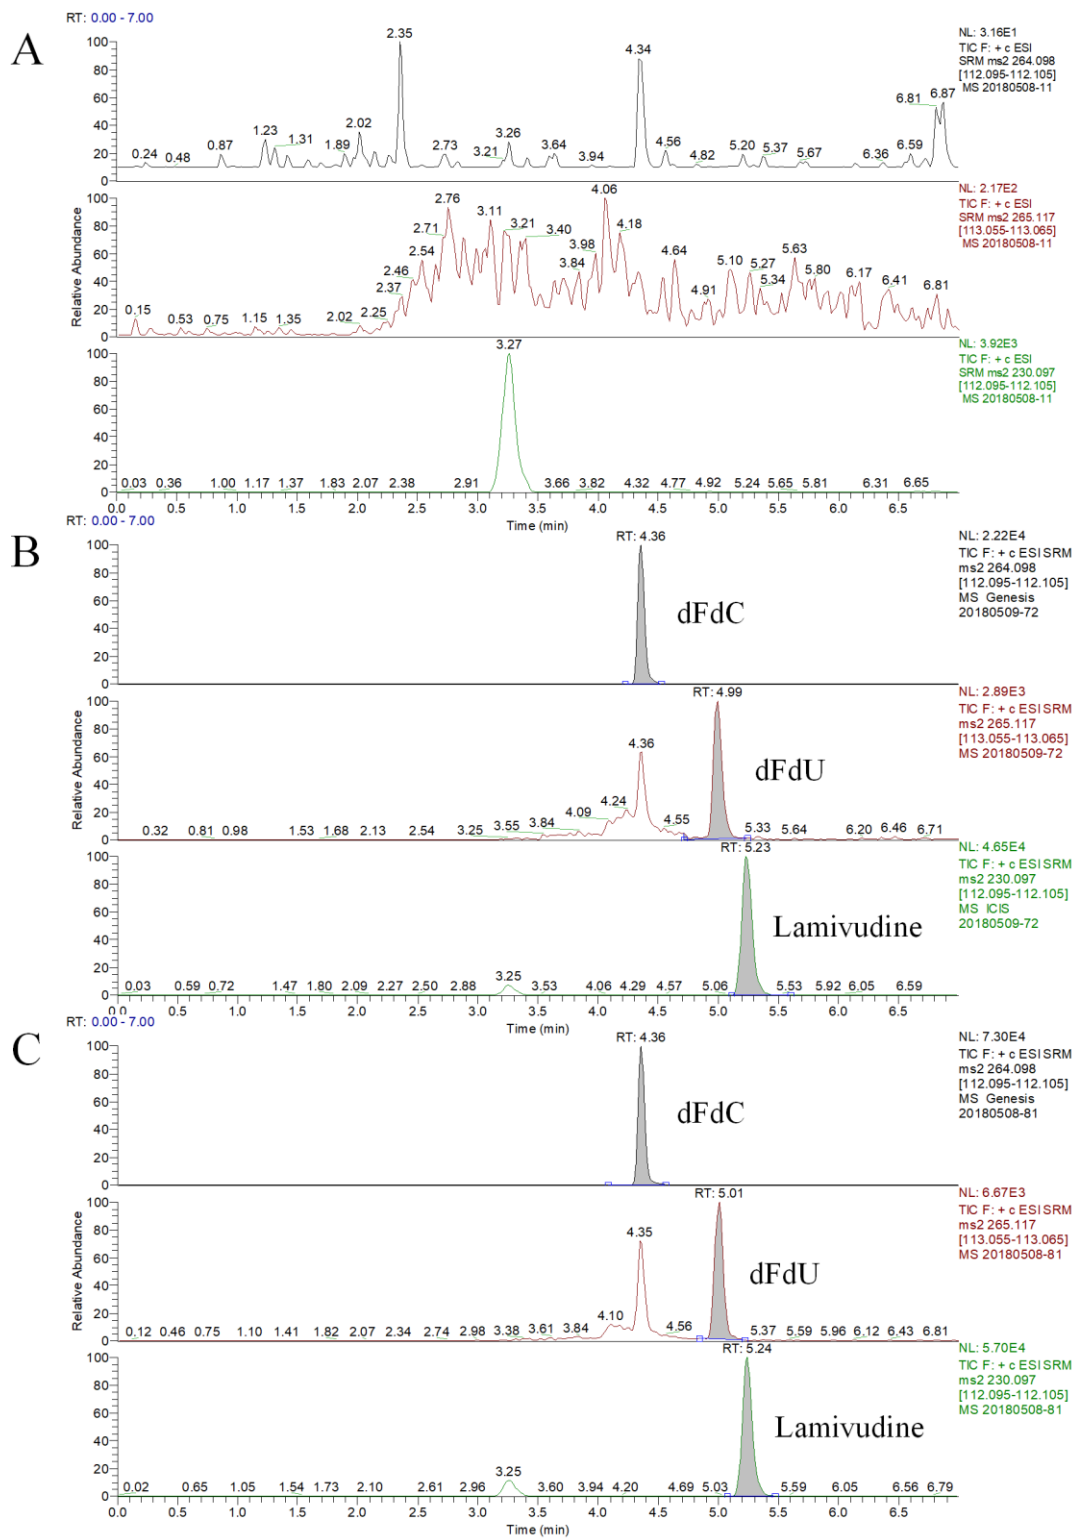

**Fig. S4.** Representative MRM chromatograms of dFdC and dFdU in rat plasma. (A) a blank plasma sample; (B) a blank plasma sample spiked with 50 ng/mL dFdC, 100 ng/mL dFdU and 40 ng/mL lamivudine as IS; (C) a 12 h plasma sample with 286.9 ng/mL dFdC and 254.1 ng/mL dFdU after intravenous administration of Gem in Gem treated group. MRM transitions and retention time: Lamivudine:  $m/z$  230 $\rightarrow$ 112 at 5.23

min; dFdC:  $m/z$  264→112 at 4.36 min; dFdU:  $m/z$  265→113 at 5.00 min.

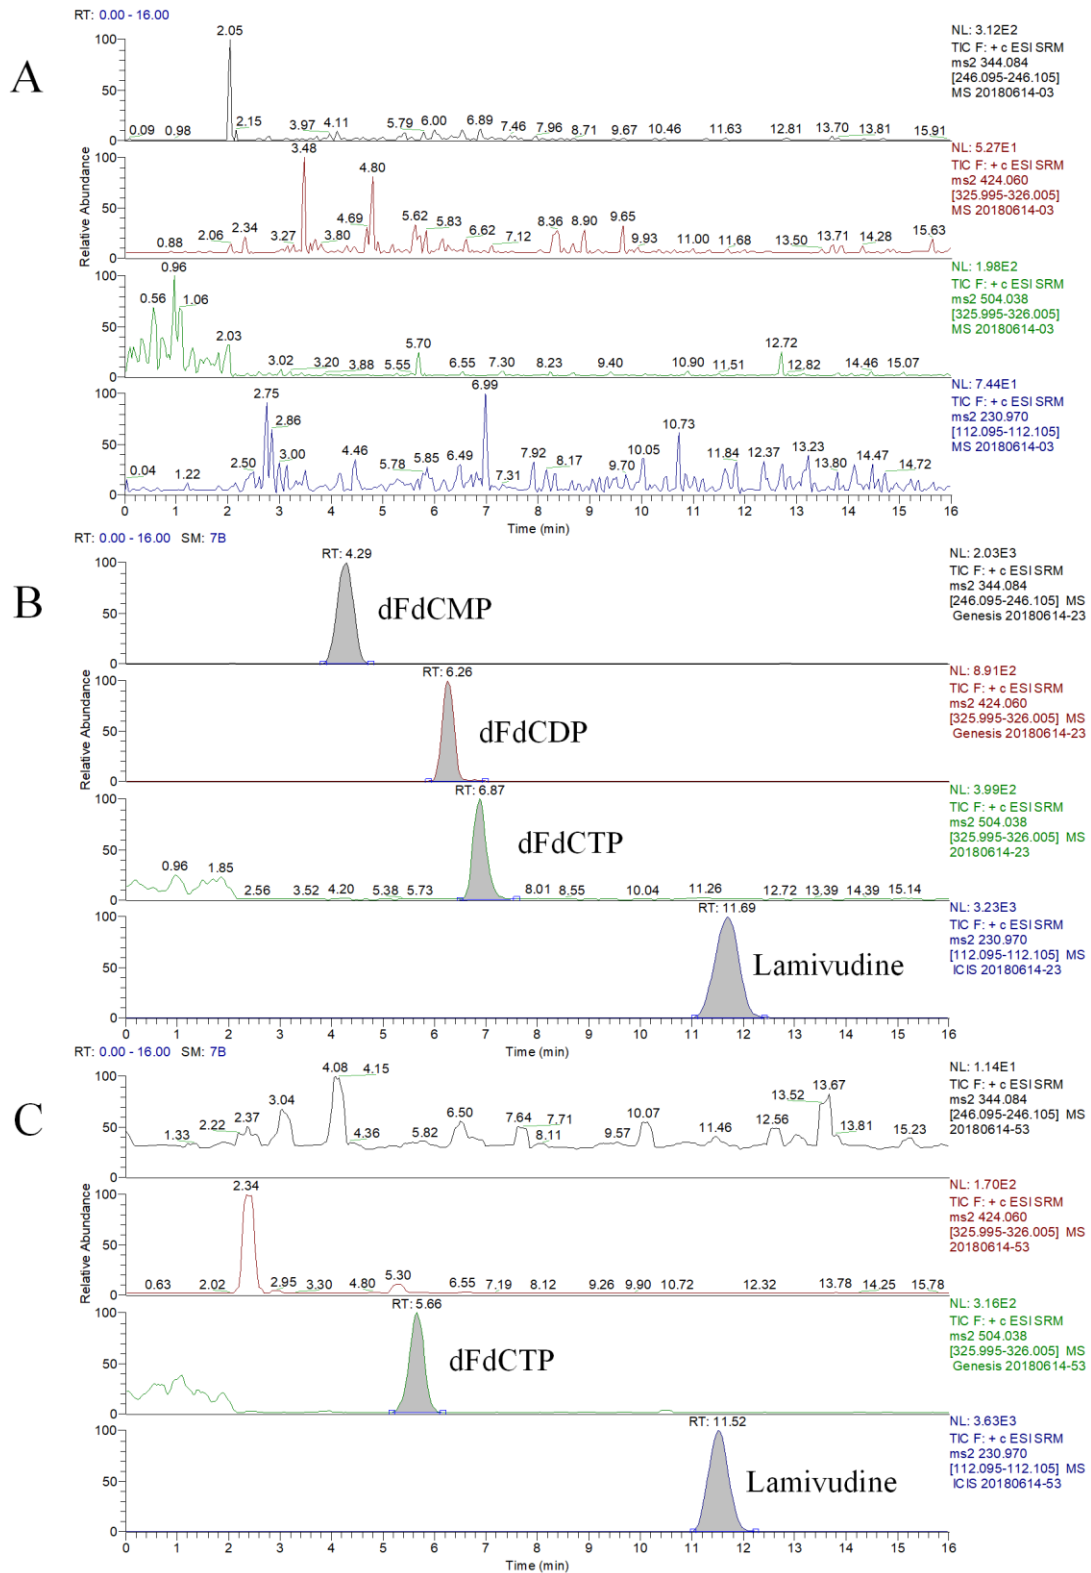

**Fig. S5.** Representative MRM chromatograms of dFdCMP, dFdCDP and dFdCTP in rat PBMC. (A) a blank PBMC sample; (B) a blank PBMC sample spiked with 100 ng/mL dFdCMP, 35 ng/mL dFdCDP, 60 ng/mL dFdCTP and 40 ng/mL lamivudine as IS; (C)

a 10 min PBMC sample with 62.0 ng/mL dFdCTP after intravenous administration of Gem in Gem treated group. MRM transitions and retention time: dFdCMP:  $m/z$  344→246 at 4.29 min; dFdCDP:  $m/z$  424→326 at 6.26 min; dFdCTP:  $m/z$  504→326 at 6.84 min; Lamivudine:  $m/z$  230→112 at 11.6 min

**Table S1**

Concentration of active ingredients in DBD.

| Ingredient                          | Concentration ( $\mu\text{g/mL}$ ) |
|-------------------------------------|------------------------------------|
| Z-Ligustilide                       | 333.1 $\pm$ 34.1                   |
| Ferulic Acid                        | 57.8 $\pm$ 10.7                    |
| Ononin                              | 75.9 $\pm$ 14.6                    |
| Coniferyl ferulate                  | 2.5 $\pm$ 0.3                      |
| Calycosin-7-O- $\beta$ -D-glucoside | 131.1 $\pm$ 15.3                   |

Data were shown as mean  $\pm$  SD, n=3.

**Table S2**

Linear regression data and lower limit of quantitation (LLOQ) of dFdC and dFdU in rat plasma.

| Analytes | Regression equation       | Linear range (ng/ml) | R <sup>2</sup> | LLOQ (ng/ml) |
|----------|---------------------------|----------------------|----------------|--------------|
| dFdC     | $y = 0.0032x + 0.0002178$ | 1.0–1000             | 0.9937         | 1.0          |
| dFdU     | $y = 0.0026x + 0.0004726$ | 20–1000              | 0.9905         | 20           |

**Table S3**

Summary of precision, accuracy, recovery and matrix effect of dFdC and dFdU in rat plasma (n = 6). (intra-day: n = 6; inter-day: n = 6 series per day, 3 days)

| Analytes | Concentration<br>(ng/mL) | Precision<br>(%, RSD) |           | Accuracy<br>(%, RE) | Matrix (%) | Recovery (%) |
|----------|--------------------------|-----------------------|-----------|---------------------|------------|--------------|
|          |                          | Intra-day             | Inter-day |                     |            |              |
| dFdC     | 2.0                      | 7.51                  | 2.85      | -8.17               | 98.63±8.81 | 117.31±7.13  |
|          | 50                       | 2.39                  | 4.49      | 11.13               | 81.04±5.45 | 91.39±6.49   |
|          | 500                      | 2.42                  | 4.63      | 2.38                | 86.16±6.28 | 85.92±4.11   |
| dFdU     | 30                       | 9.61                  | 9.61      | 1.52                | 54.85±3.78 | 92.80±7.32   |
|          | 100                      | 6.78                  | 4.75      | 3.50                | 55.35±5.39 | 79.55±1.68   |
|          | 500                      | 2.42                  | 7.59      | -0.26               | 50.77±5.30 | 77.32±4.54   |

**Table S4**

Stability of dFdC and dFdU in rat plasma under different conditions (n = 6).

| Analytes | Concentration<br>(ng/ml) | 3 times     |            | 12 h Room   |            | 2 weeks   |            | 24 h Post-  |            |
|----------|--------------------------|-------------|------------|-------------|------------|-----------|------------|-------------|------------|
|          |                          | Freeze thaw |            | temperature |            | Long-term |            | preparative |            |
|          |                          | RE<br>(%)   | RSD<br>(%) | RE<br>(%)   | RSD<br>(%) | RE<br>(%) | RSD<br>(%) | RE<br>(%)   | RSD<br>(%) |
| dFdC     | 2                        | -6.3        | 11.4       | -10.5       | 13.7       | -7.2      | 5.8        | -8.6        | 6.5        |
|          | 50                       | 5.2         | 5.4        | 8.6         | 12.1       | 10.7      | 10.3       | -2.2        | 3.4        |
|          | 500                      | 2.1         | 9.9        | -5.9        | 6.5        | -8.1      | 3.1        | 4.4         | 7.8        |
| dFdU     | 30                       | 11.5        | 9.5        | -12.6       | 10.5       | 6.5       | 12.6       | -10.5       | 6.7        |
|          | 100                      | -8.6        | 12.5       | 8.7         | 5.8        | -11.5     | 5.2        | 8.5         | 9.5        |
|          | 500                      | 7.1         | 6.8        | 9.2         | 8.5        | 8.2       | 6.8        | 7.2         | 2.9        |
